1 **Analysis of vascular architecture and parenchymal damage**  
2 **generated by reduced blood perfusion in decellularized porcine**  
3 **kidneys using a gray level co-occurrence matrix**

4 **Igor V. Pantić<sup>1,2</sup>, Adeeba Sharkeel<sup>3</sup>, Georg A. Petroianu<sup>4</sup>, Peter R. Corridon<sup>3,5,6,7,\*</sup>**

5 <sup>1</sup>University of Belgrade, Faculty of Medicine, Department of Medical Physiology, Visegradska 26/II,  
6 RS-11129, Belgrade, Serbia

7 <sup>2</sup>University of Haifa, 199 Abba Hushi Blvd. Mount Carmel, Haifa IL-3498838, Israel

8 <sup>3</sup>Department of Immunology and Physiology, College of Medicine and Health Sciences, Khalifa  
9 University of Science and Technology, PO Box 127788, Abu Dhabi, UAE

10 <sup>4</sup>Department of Pharmacology, College of Medicine and Health Sciences, Khalifa University of  
11 Science and Technology, PO Box 127788, Abu Dhabi, UAE

12 <sup>5</sup>Wake Forest Institute for Regenerative Medicine, Medical Center Boulevard, Winston-Salem, NC  
13 27157-1083, USA

14 <sup>6</sup>Biomedical Engineering, Healthcare Engineering Innovation Center, Khalifa University of  
15 Science and Technology, PO Box 127788, Abu Dhabi, UAE

16 <sup>7</sup>Center for Biotechnology, Khalifa University of Science and Technology, PO Box 127788, Abu  
17 Dhabi, UAE

18 **\* Correspondence:**

19 Peter R. Corridon

20 peter.corridon@ku.ac.ae

21 **Keywords:** Decellularized Kidney Scaffold, Vascular Architecture, Parenchymal Damage, Gray  
22 Level Co-occurrence Matrix Algorithm, Angiography, Bioengineering, Bioartificial Kidney

23 **Abstract**

24 There is no cure for kidney failure, but a bioartificial kidney may help address this global problem.  
25 Decellularization provides a promising platform to generate transplantable organs. However,  
26 maintaining a viable vasculature is a significant challenge to this technology. Even though angiography  
27 offers a valuable way to assess scaffold structure/function, subtle changes are overlooked by  
28 specialists. In recent years, innovative image analysis methods in radiology have been suggested to  
29 detect and identify subtle changes in tissue architecture. The aim of our research was to apply one of  
30 these methods based on a gray level co-occurrence matrix (GLCM) computational algorithm in the  
31 analysis of vascular architecture and parenchymal damage generated by hypoperfusion in  
32 decellularized porcine. Perfusion decellularization of the whole porcine kidneys was performed using  
33 previously established protocols. We analyzed and compared angiograms of kidneys subjected to  
34 pathophysiological arterial perfusion of whole blood. For regions of interest (ROIs) covering kidney  
35 medulla and the main elements of the vascular network, five major GLCM features were calculated:  
36 angular second moment as an indicator of textural uniformity, inverse difference moment as an  
37 indicator of textural homogeneity, GLCM contrast, GLCM correlation, and sum variance of the co-  
38 occurrence matrix. In addition to GLCM, we also performed discrete wavelet transform analysis of  
39 angiogram ROIs by calculating the respective wavelet coefficient energies using high and low-pass  
40 filtering. We report statistically significant changes in GLCM and wavelet features, including the  
41 reduction of the angular second moment and inverse difference moment, indicating a substantial rise

42 in angiogram textural heterogeneity. Our findings suggest that the GLCM method can be successfully  
43 used as an addition to conventional fluoroscopic angiography analyses of micro/macrovacular  
44 integrity following in vitro blood perfusion to investigate scaffold integrity. This approach is the first  
45 step toward developing an automated network that can detect changes in the decellularized vasculature.

## 46 **1 Introduction**

47 The incidence of kidney failure, otherwise known as end-stage renal disease (ESRD) is rising globally  
48 (Arikan et al., 2021; Kari et al., 2021). Unfortunately, there is no cure for this condition, which can  
49 develop from the progression of acute and chronic injuries (Hsu and Hsu, 2016; Kolb et al., 2018;  
50 Corridon et al., 2021). Currently, transplantation is the best option to treat ESRD. Nevertheless, very  
51 few patients receive a timely transplant due to the complexity of the procedure, lack of donors, low  
52 viability of organs, and prevailing immunological incompatibilities (Saidi and Hejazii Kenari, 2014;  
53 Job and Antony, 2018; Wu et al., 2021). As a result, there is a definite need for alternatives to address  
54 this worldwide problem. Whole organ bioengineering has been proposed as one such alternative. Major  
55 advancements in this field have been developed using three-dimensional bioprinting, advanced stem  
56 cell technologies, and organ decellularization. Among these advancements, decellularization  
57 techniques currently hold the most promise for creating a bioartificial kidney (Sohn et al., 2020).

58 Decellularization is a unique alternative to porous scaffold fabrication systems, additive  
59 manufacturing procedures, and hydrogels, as it provides the necessary physical and biochemical  
60 environments to facilitate cell and tissue growth. This technology has garnered much attention within  
61 the past decade, as acellular scaffolds have been generated using bovine, equine, leporine, murine, and  
62 porcine models. However, substantial compromises to the scaffold architecture, observed under  
63 physiological conditions, inhibit their long-term viability and clinical utility (Zambon et al., 2018;  
64 Corridon, 2021). Thus, further research is needed to overcome problems related to vascularization and  
65 help realize the promise of a bioartificial kidney (Feng et al., 2020). Using this assertion, it is necessary  
66 to devise methods to better evaluate vascular patency in post-transplantation settings. Imaging  
67 modalities like X-ray/computed tomography, magnetic resonance imaging, ultrasonography and  
68 positron emission tomography have been applied to investigate the decellularized vascular architecture  
69 (Huling et al., 2016). These techniques provide useful information on the scaffold structure and  
70 function, as well as insight on the deformation that can arise after transplantation (Corridon, 2021).  
71 Yet, the low spatial resolution, artifacts, and unwanted morphological alterations have always proved  
72 to be challenging to detect subtle defects (Mostaco-Guidolin et al., 2013). Such challenges have paved  
73 the way for radiomic approaches that can extract features far beyond the capability of the human eye  
74 or brain to appreciate (Neri et al., 2019).

75 Computer-automated mathematical image analysis methods have emerged to give potentially  
76 wide applications in radiology. In recent years, many innovative techniques, and algorithms have been  
77 proposed and tested, often with limited success regarding their potential for integration in current  
78 diagnostic and research protocols. Future developments in information technology ensure that many  
79 of these techniques will significantly improve diagnostic and prognostic accuracies in X-ray computed  
80 tomography, fluoroscopy, and angiography (Cao et al., 2019; Kolossvary et al., 2021; V et al., 2021).  
81 Computational methods that use statistical analyses in evaluating image texture are potentially  
82 instrumental in X-ray imaging since they may enable fast, objective, and accurate detection of subtle  
83 changes in tissue architecture that are occasionally hard to notice during the conventional assessment.  
84 One such method is based on the gray level co-occurrence matrix (GLCM) algorithm, which has  
85 attracted much attention in computational medicine. The technique uses second-order statistics to  
86 determine indicators that reflect image features such as textural homogeneity, uniformity, and level of  
87 disorder. Previously, some of these indicators, such as angular second moment and inverse difference

88 moment, have proven to be sensitive in assessing data obtained as the result of various X-ray digital  
89 image transformations (Chen et al., 2021; Kolossvary et al., 2021; Shankar et al., 2021).

90 In angiography, GLCM was successfully used as an addition to volumetric and radiomic metrics  
91 and image reconstruction of coronary lesions (Kolossvary et al., 2019). Also, some authors have  
92 previously demonstrated the potential of this method to evaluate endoleaks in aneurysmatic thrombus  
93 CT images of abdominal aorta (Garcia et al., 2012). Endovascular aortic aneurysm repair evolution  
94 might also be indirectly assessed with the help of GLCM and other textural algorithms (Garcia et al.,  
95 2014). Finally, in some experimental animal models, this form of textural analysis may be used to  
96 research pulmonary parenchymatous changes associated with pulmonary thromboembolism  
97 (Marschner et al., 2017). To the best of our knowledge, no such applications of GLCM have been used  
98 in evaluating kidney vascular architecture.

99 The aim of our work was to apply a gray level co-occurrence matrix GLCM computational  
100 algorithm to collectively assess vascular architecture and parenchymal damage generated from  
101 hypoperfusion in decellularized porcine kidneys using fluoroscopic angiography. We present evidence  
102 that GLCM may be highly applicable in the evaluation of normal and pathological kidney angiograms  
103 indicating its potential for inclusion in contemporary research practices in this area of radiology. Also,  
104 this is the first study to quantify textural changes in vascular architecture in decellularized kidney  
105 scaffolds, serving as the useful basis for future research on this organ model. Overall, this approach is  
106 the initial step toward developing an automated network that can detect changes in the decellularized  
107 vasculature.

## 108 **2 Materials & Methods**

### 109 **2.1 Experimental animals**

110 Adult Yorkshire pigs were euthanized, and whole kidneys were harvested under the guidelines  
111 provided by the Institutional Animal Care and Use Committee (IACUC) at the School of Medicine,  
112 Wake Forest University. All experimental protocols followed the ethical guidelines and regulations  
113 approved by Wake Forest University and the Animal Research Oversight Committee (AROC) at  
114 Khalifa University of Science and Technology. Moreover, all methods were performed in accordance  
115 with the Animal Research: Reporting of *In Vivo* Experiments (ARRIVE) guidelines.

### 116 **2.2 Porcine kidney perfusion decellularization and sterilization**

117 Whole porcine kidneys were extracted with intact renal arteries, veins, and ureters. The kidneys were  
118 then decellularized and sterilized using previously established protocols (Sullivan et al., 2012; Zambon  
119 et al., 2018; Corridon, 2021). Briefly, triton X-100, SDS, and phosphate-buffered saline (PBS) were  
120 slowly infused into cannulated renal arteries at a constant rate of 5 ml/min. Initially, 1% Triton X-100  
121 was perfused through the renal artery for 36 h followed by 0.5% SDS dissolved in PBS for another 36  
122 h. Finally, to remove the residual traces of detergents and cellular components, PBS was perfused  
123 through the kidneys for 72 h. The decellularized scaffolds were then submerged in PBS and sterilized  
124 with 10.0 kGy gamma irradiation.

### 125 **2.3 Blood perfusion studies**

126 Blood perfusion studies were carried out as previously reported (Corridon, 2021). Prior to perfusion,  
127 the bioreactor components, namely, suction pump heads (Ismatec, Cole-Palmer, Wertheim, Germany),  
128 standard pump tubing female and male luer x1/8" hose barb adapters, barbed fittings, reducing  
129 connectors, three-way stop cocks, and Kynar adapters (Cole-Palmer, Vernon Hills, IL, USA) were  
130 sterilized using a 60Co Gamma Ray Irradiator. While the bioreactor tubing, chambers, and 2000 ml

131 round wide mouth media storage bottles with screw caps assemblies (Sigma-Aldrich, St. Louis, MO,  
132 USA) were autoclaved.

133 Once sterilized, the bioreactor systems were assembled within a biosafety cabinet as described  
134 earlier (Corridon, 2021). Concisely, the chamber was assembled in a way that ensured the two outer  
135 blood flow lines were attached on either side of the suction pump head. This aided arterial outflow  
136 from the Ismatec MCP-Z Process or MCP-Z Standard programmable dispensing pump (Cole-Palmer,  
137 Vernon Hills, IL, USA) into the chamber's arterial line while the venous returns to the pump via the  
138 venous line. The scaffold was suspended in a reservoir of roughly 500 ml of heparinized pig whole  
139 blood in the bioreactor chamber (BioIVT, Westbury, NY, USA). The renal artery was attached to the  
140 arterial line inside the chamber. In comparison, the renal vein cannula remained detached to allow  
141 venous outflow from the scaffold into the reservoir. The venous line was freely suspended into the  
142 reservoir to support unreplenished and unfiltered blood recirculation through the dispensing pumps.  
143 The entire assembled bioreactor system was then placed in a cell culture incubator, and scaffolds were  
144 subjected to continuous hypoperfusion (at a rate  $< 500$  ml/min) for 24 hrs. At the 24-h time point,  
145 perfusion was ceased, and the scaffolds were removed from the chambers and placed in 60 x 15 mm  
146 sterilized polystyrene Petri dishes (Sigma-Aldrich, St. Louis, MO, USA) for fluoroscopic angiography.  
147

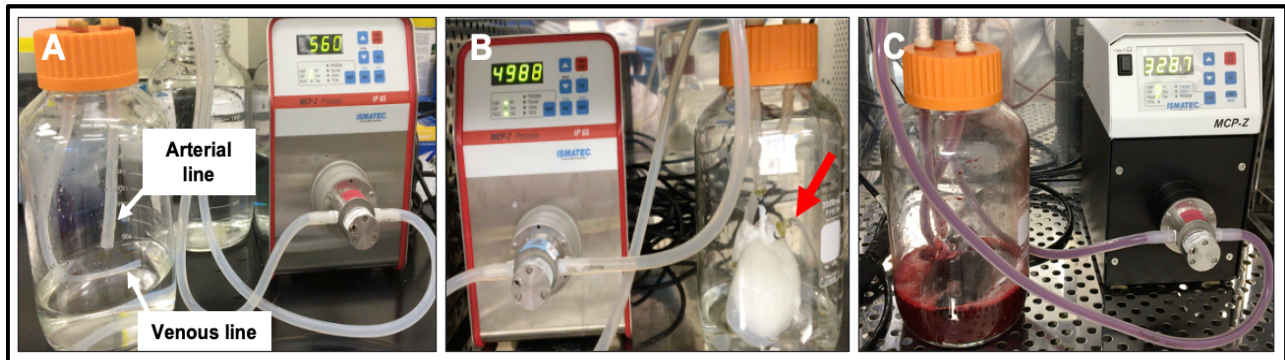

148  
149

150 **FIGURE 1.** Photographs of the bioreactor used to perfuse decellularized scaffolds with whole blood  
151 (A) Image outlining the arterial line (which was then attached to the cannulated renal artery) and venous  
152 lines (which was left open to act as a venous reservoir to facilitate fluid recirculation) before the  
153 addition of the scaffold. (B) Image of an acellular kidney perfused with PBS illustrates how the scaffold  
154 recirculated fluid that emanated from its renal vein (red arrow) and open-ended venous line. (C) Image  
155 of a scaffold being perfused with whole pig blood.

## 156 2.4 Fluoroscopic angiography

157 Native and decellularized kidneys were first infused with 100 ml PBS via the renal artery. The contrast  
158 agent was infusion of Iothalamate meglumine contrast agent (60% Angio-Conray, Mallinckrodt Inc.,  
159 St Louis, MO, USA). Once a sturdy flow of exiting contrast agent was achieved, the renal vein, renal  
160 artery, and ureter were occluded to prevent the contrast agent from leaking out of the organ.  
161 Angiograms were collected at ambient temperature in a sterilized suite with a Siemens C-arm  
162 Fluoroscope (Siemens AG, Munich, Germany).

## 163 2.5 GLCM analysis

164 We performed GLCM analysis of selected regions of interest in angiograms using Mazda  
165 computational platform. This software was created by Michal Strzelecki and Piotr Szczypinski of the  
166 Institute of Electronics, Technical University of Lodz (Szczypinski et al., 2007; Szczypinski et al.,  
167 2009; Strzelecki et al., 2013), Poland as a part of COST B21 European project "Physiological



168 modelling of MR Image formation”, and COST B11 AQ6 European project “Quantitative Analysis of  
169 Magnetic Resonance Image Texture” (1998–2002). The software, originally made using C++ and  
170 Delphi© programming languages can accurately calculate GLCM features on multiple regions of  
171 interest (ROIs) of high-resolution BMP images making it an ideal candidate for textural analysis of  
172 angiograms.

173 In our angiograms in BMP format (bit depth equaled 24), we formed ROIs covering kidney  
174 medulla and the main elements of the vascular network, with the area of approximately 80000  
175 resolution units (width of 200 and height of 400 resolution units) as shown in **Figure 2B**. For each  
176 ROI, five major GLCM features were calculated: angular second moment, inverse difference moment,  
177 GLCLM contrast, GLCM Correlation and Sum variance of the co-occurrence matrix. GLCM method  
178 assigns values to resolution units depending on their gray intensity, after which a series of complex  
179 second-order statistical calculations are performed on resolution unit pairs considering their distance  
180 and orientation. Values of individual GLCM features depend on the distribution patterns of the gray  
181 intensity pairs and the numerical organization of the resulting co-occurrence matrix.

182 In GLCM analysis, angular second moment (ASM) represents the level of textural uniformity  
183 in two-dimensional signal. It can be calculated as:

184

$$\text{ASM} = \sum_i \sum_j \{p(i, j)\}^2$$

185 In this formula,  $p(i, j)$  is the  $(i, j)$ th entry of the gray-level co-occurrence matrix, after the normalization.  
186 In this work, angular second moment was in essence a tool for quantification of textural orderliness of  
187 the angiogram ROIs.

188  
189 A relatively similar feature to angular second moment that can also be calculated during GLCM  
190 analysis is inverse difference moment. Inverse difference moment (Maidman et al.) is often used to  
191 quantify the level of textural smoothness, sometimes also referred to as “homogeneity”. It can be  
192 calculated as:

193

$$\text{IDM} = \sum_i \sum_j \frac{1}{1+(i-j)^2} p(i, j)$$

194 Some textural features take into account the mean ( $\mu$ ) and the standard deviation ( $\sigma$ ) of normalized  
195 GLCM rows (i.e.,  $x$  or  $y$ ). Such is the GLCM Correlation parameter which is determined as:

196

$$\text{COR} = \frac{\sum_i \sum_j (ij)p(i, j) - \mu_x \mu_y}{\sigma_x \sigma_y}$$

197 Textural sum variance feature is also a useful measure that can indirectly measure the level of  
198 dispersion around the mean of the matrix:

199

$$\text{SVAR} = \sum \left[ i - \sum p_{x-y}(i) \right]^2$$

200 Finally, in our study, we also quantified the textural contrast feature as:

201

$$\text{CON} = \sum_i \sum_j (i - j)^k P_d[i, j]^n$$

202 Textual contrast was used to quantify the difference between the neighbouring resolution units  
203 considering their respective gray intensities. For details on GLCM algorithm and the calculation of  
204 features, the reader is referred to previous works that deal on the application of this method in  
205 medical and other sciences (Haralick et al., 1973; Santos et al., 2015; Topalovic et al., 2021).

## 206 **2.6 Discrete wavelet transform features**

207 Discrete wavelet transform (DWT) analysis of angiogram ROIs was performed as an addition to  
208 calculation of GLCM features. The DWT algorithm in Mazda software includes linear transformation  
209 of data vectors to numerical vectors taking into account their lengths (in case of data vectors, the length  
210 of an integer power of two). The analysis is performed separately on rows and columns of data with  
211 the application of high (H) and low-pass (L) filtering (Kociolek et al., 2001). The final output of DWT  
212 includes energies ( $E_n$ ) of wavelet coefficients ( $d$ ) in different subbands (for a respective subband  
213 location  $x$  and  $y$ ) at different scales for a ROI resolution unit number ( $n$ ):

$$214 \quad E = \frac{\sum_{x,y \in ROI} (d_{x,y}^{subband})^2}{n}$$

215 Previous research on application of DWT in microscopy has indicated that textural heterogeneity may  
216 influence the values of coefficient energies in subbands. In this work, we focused on the quantification  
217 of 3 such energies depending on the use of high (H) and low-pass (L) filtering: EnLH, EnHL and  
218 EnHH. Additional details on DWT algorithm can be found in previous publications (Kociolek et al.,  
219 2001; Paunovic et al., 2021a).

## 220 **3 Results**

### 221 **3.1 Scaffold Perfusion Analyzed using Fluoroscopic Angiography and Venous Outflow**

222 Fluoroscopic angiography showed that the vascular network was well-preserved post decellularization  
223 (**Figure 2B**). Angiograms taken from decellularized kidneys post-perfusion with unreplenished and  
224 unfiltered blood for 24 h revealed significant alterations in the decellularized vascular architecture and  
225 parenchyma (**Figure 2C**). The standard arterial branching patterns were noticeably disrupted by the  
226 end of perfusion, making it difficult to detect and differentiate the different branches of the arterial tree.  
227 Substantial levels of contrast agent extravasation were also observed throughout the cortical and  
228 medulla regions highlighting deleterious modifications to the decellularized renal parenchyma.  
229 Moreover, the hypoperfused acellular kidneys were unable to perfuse blood throughout their vascular  
230 networks and showed notable signs of thrombosis and cessation of venous outflow.  
231

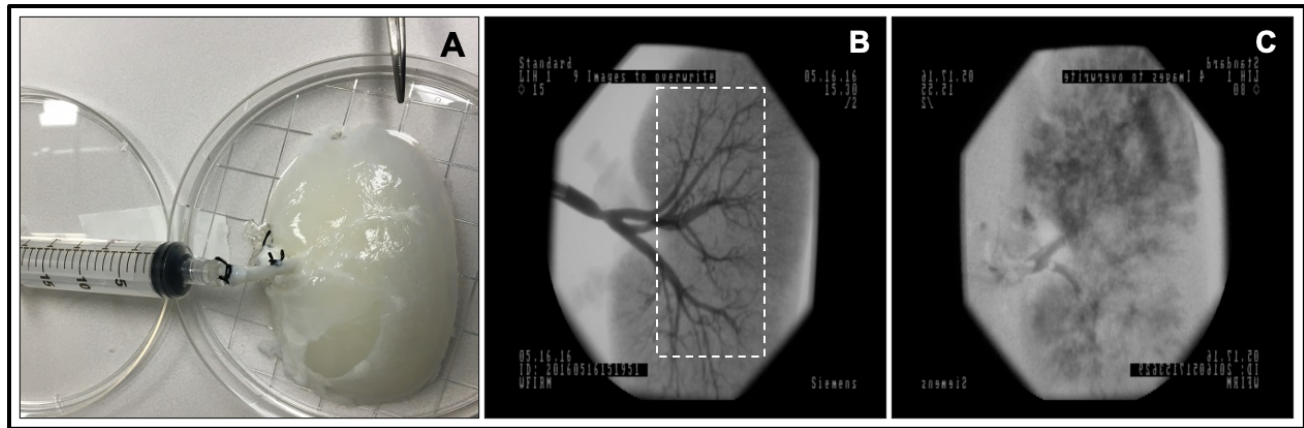

232

233 **FIGURE 2.** Fluoroscopic angiography. (A) Photograph of a decellularized scaffold that was set to be  
234 infused with contrast agent. (B) An angiogram of the scaffold before it was perfused with blood  
235 displaying the decellularized vascular network and region of interest (ROI), dashed rectangular region,  
236 covering kidney medulla and the main elements of this network. (C) An angiogram of the scaffold after  
237 24 h of hypoperfusion (arterial infusion rate 20 ml/min).

### 238 3.2 GLCM Analysis

239 The average angular second moment of the ROIs was  $0.030 \pm 0.018$  for decellularized kidneys before  
240 perfusion (pre-perfusion) and  $0.053 \pm 0.022$  for after perfusion (post post-perfusion) angiograms  
241 (**Figure 3A**). Statistically highly significant difference was observed ( $p < 0.01$ ). This result implied a  
242 substantial reduction of textural uniformity in post-perfusion vascular architecture. Similar reduction  
243 was observed with the mean values of inverse difference moment ( $0.781 \pm 0.046$  in post-perfusion  
244 compared to  $0.805 \pm 0.026$  in controls) (**Figure 3B**). The difference was significant ( $p < 0.05$ ) which  
245 implied that the textural homogeneity of ROIs decreased.

246 On the other hand, there was a substantial rise in the average values of GLCM Contrast (**Figure**  
247 **3C**), GLCM Correlation feature (**Figure 3D**) and Sum variance (**Figure 3E**). The largest increase was  
248 observed in Sum variance ( $127.99 \pm 91.53$  in post-perfusion versus  $52.48 \pm 43.36$  in pre-perfusion  
249 angiograms,  $p < 0.01$ ) followed by the Correlation ( $0.989 \pm 0.007$  versus  $0.978 \pm 0.008$ ,  $p < 0.01$ ), and  
250 lastly GLCM Contrast ( $0.51 \pm 0.15$  versus  $0.44 \pm 0.09$ ,  $p < 0.05$ ). This is in line with the results of the  
251 values of angular second moment and inverse difference moment, and imply the rise of the overall  
252 textural heterogeneity of vascular architecture.

253 We also observed some changes in wavelet coefficient energies of the ROIs, however these changes  
254 were not as drastic as the ones exhibited by GLCM features. The average value of EnLH rose from  
255  $1.17 \pm 0.45$  in controls to  $1.54 \pm 0.70$  in post-perfusion angiograms ( $p < 0.05$ ). Similar rise and level  
256 of significance was observed for EnHL means ( $1.07 \pm 0.36$  compared to  $1.37 \pm 0.53$  in controls,  $p <$   
257  $0.05$ ). Regarding EnHH, the average value in pre-perfusion angiograms was  $0.08 \pm 0.01$  and in post-  
258 perfusion angiograms it rose to  $0.09 \pm 0.02$  ( $p > 0.05$ ).

259 Significant correlations were detected between GLCM and DWT parameters in both groups of  
260 angiograms. For example, statistically highly significant negative correlation ( $p < 0.01$ ) existed  
261 between the DWT EnHL feature and the values of inverse difference moment. Similar statistically  
262 highly significant negative correlation ( $p < 0.01$ ) was observed between EnHH feature and the values  
263 of angular second moment. These associations are expected, they are partly the result of the  
264 methodological similarities during the implementation of GLCM and DWT algorithms, and confirm  
265 the validity of the obtained dataset.

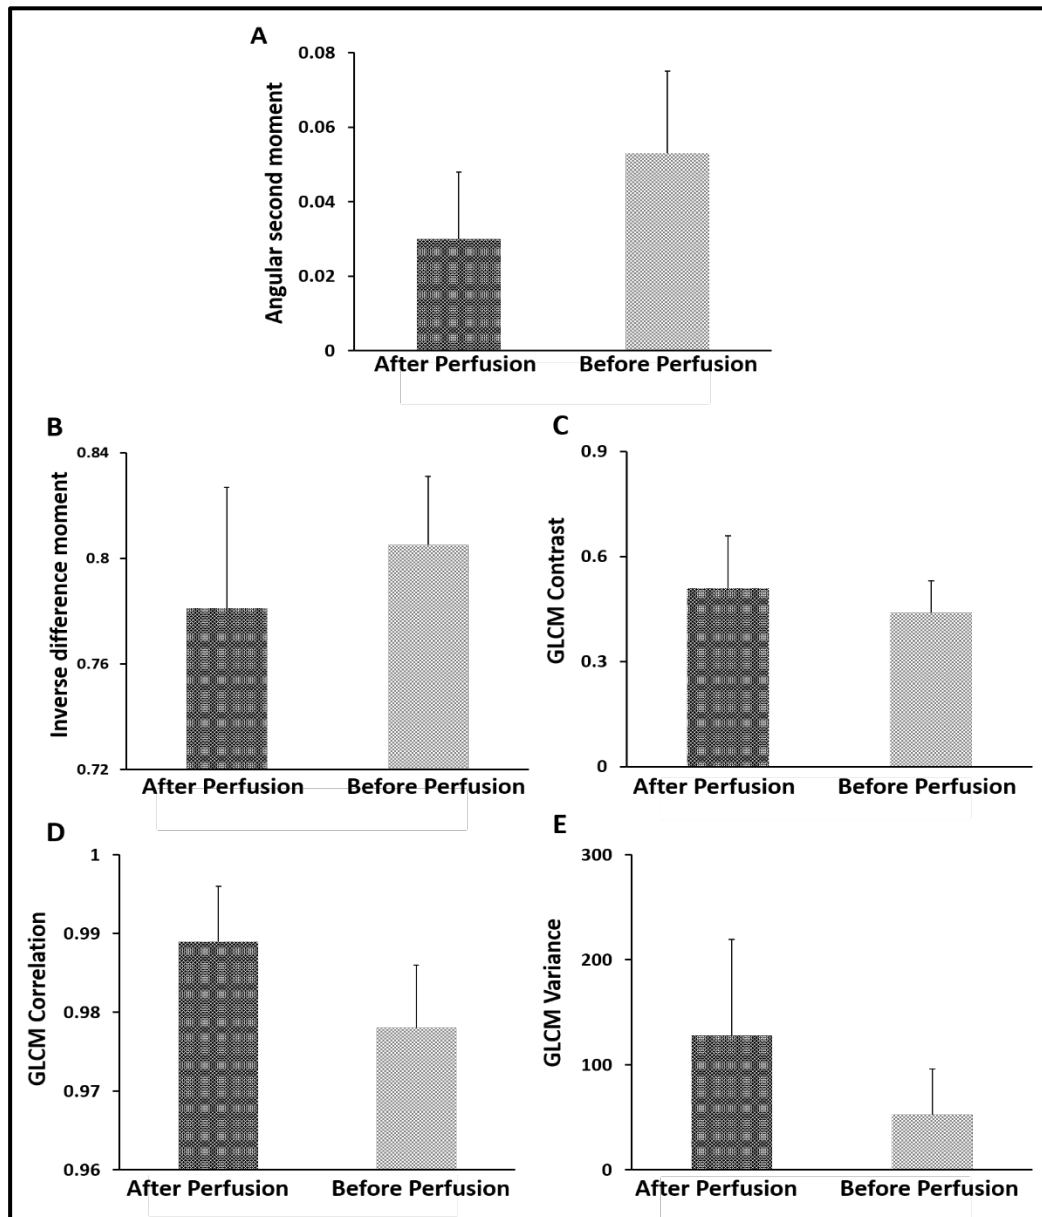

266

267 **FIGURE 3.** GLCM analysis. (A) Average angular second moment. (B) Inverse difference  
268 momentum. (C) GLCM contrast. (D) GLCM correlation. (E) GLCM variance.

## 269 4 Discussion

270 Time and again, emphasis has been given to the importance of maintaining the integrity of vascular  
271 networks in decellularized organs for transplantation. In this study, we applied textural analysis  
272 algorithms based on gray level co-occurrence matrix and discrete wavelet transform to investigate the  
273 pathologically changes in the vascular architecture of the decellularized kidneys subjected to conditions  
274 that mimic renal artery stenosis (Corridon, 2021). This form of stenosis is a well-recognized disorder  
275 that compromises transplantation and has been shown to denature the acellular vascular tracks. Such  
276 deformation also leads to aberrant changes in the decellularized parenchyma. The images obtained  
277 using fluoroscopic angiography showed that significant differences in both GLCM and DWT features  
278 could be detected using this approach. Our findings imply that textural analysis, as a set of



279 contemporary and innovative computer-based methods, has a great potential to be used as an addition  
280 to the conventional angiographic evaluation of the renal vascular network.

281 Perhaps the most important finding was the observed significant change of inverse difference  
282 moment of angiogram ROIs. This GLCM feature indicates textural homogeneity and is often used to  
283 quantify smoothness in the distribution of resolution units in grayscale images. Previous research  
284 articles in digital micrographs have shown the potential value of inverse difference moment in detecting  
285 structural alterations that are not visible to a professional pathologist (Paunovic et al., 2021b). Along  
286 with angular second moment and GLCM contrast, this is probably also one of radiology's most  
287 frequently calculated textural features.

288 Generally, in the past, the most frequent application of textural computational algorithms in  
289 radiology was to assess images obtained through nuclear magnetic resonance, computerized  
290 tomography, and other tomography techniques. Probably the most common approach is to compare the  
291 images of tissue lesions or other pathological changes in tissue architecture with controls. After that,  
292 one of the possibilities is to determine the sensitivity of individual GLCM features for lesion detection  
293 or to test the discriminatory power of the method regarding the separation of post- and pre- perfusion  
294 radiographs or parts of a radiograph (Chen et al., 2021). Another strategy would be to use GLCM  
295 features as prediction tools for disease prognosis (Huang et al., 2021), or to test their ability to  
296 determine boundaries of the lesion in the same radiograph. Finally, it may be possible to develop a  
297 scoring system that considers GLCM (and other) indicators of texture and test its sensitivity and  
298 specificity (Thuillier et al., 2021).

299 In angiography, the GLCM method is much less frequently applied, and so far, only a handful  
300 of studies have been published on this topic. These mainly include the use of GLCM features for  
301 assessment of low attenuation noncalcified (LANCP), noncalcified and calcified coronary plaques  
302 (Kolossvary et al., 2019; Kolossvary et al., 2021), or for computer-aided diagnosis-specific cases of  
303 endovascular aortic aneurysms (Garcia et al., 2014). In optical coherence tomography angiography, as  
304 demonstrated earlier, some GLCM indicators can also be applied to quantify choriocapillaris in healthy  
305 and diseased eyes (Khan et al., 2020). To the best of our knowledge, there hasn't been a similar study  
306 trying to apply texture analysis for the assessment of vascular changes in kidney tissue. Therefore, our  
307 research is probably the first to demonstrate the applicability of these computational algorithms  
308 (GLCM and DWT techniques on an experimental model of decellularized kidney) in this rapidly  
309 developing area of radiology and also provides a potentially useful foundation for future research.

310 In the future, probably the most important application of both GLCM and DWT analyses will  
311 be to provide inputs for various artificial intelligence-based methods for image analysis in radiology.  
312 This application would include training and testing different machine learning models, some of which  
313 have already been suggested as suitable for GLCM data (Davidovic et al., 2021). The examples would  
314 be conventional decision tree algorithms such as CHAID (Chi-square Automatic Interaction Detector)  
315 or CART (classification and regression tree) or some more modern approaches such as random forests.  
316 Support vector machines, naive Bayes, linear discriminant analysis, and similarity learning are  
317 potential alternative strategies. The most considerable potential regarding the use of GLCM and DWT  
318 raw data may lie in designing various types of neural networks. This process includes simple concepts  
319 such as a multilayer perceptron or more complex ones such as recurrent and convolutional neural  
320 networks. Convolutional neural networks are a fascinating approach since they are already widely used  
321 in medicine and other disciplines of computer vision. Despite the promises that such a computer  
322 algorithm makes, many loopholes still need to be addressed that will require extensive quality  
323 assurance of these methods, including testing inter- and intra-observer reliability, for their effective  
324 application in the clinics.

325 As mentioned, the limitations of our study include the relatively small sample, which is not  
326 sufficient for the implementation of the more complex approaches such as machine learning or the  
327 creation of other artificial intelligence-based models. Also, another important aspect to consider is that

328 the results of GLCM and DWT generally depend on various factors associated with image creation.  
329 Brightness, contrast, hue, saturation, and many other image parameters which can vary in angiograms  
330 can substantially impact GLCM features such as angular second moment or inversed difference  
331 moment. Finally, to our knowledge, the results of the textural analysis are not always the same across  
332 different computational platforms. Such variations can arise from the fact that existing software  
333 algorithms may use images in different formats (8-bit, 16-bit, BMP, JPG, etc.) or because of many  
334 other technical issues and solutions the developers tried to include into the programming code. All of  
335 these issues may in the future hinder the potential of successful integration of textural analysis methods  
336 in contemporary diagnostic protocols. For this to happen, extensive quality assurance of the processes,  
337 including testing inter- and intra-observer reliability, will have to be performed.

## 338 **5 Conclusion**

339 Our results designate that certain discrete changes in vascular architecture and renal parenchyma in the  
340 decellularized kidney can be successfully detected using contemporary innovative computational  
341 algorithms for texture analysis, thereby overcoming the limitations of conventional imaging modalities.  
342 We report statistically significant changes in GLCM and wavelet features, including reducing angular  
343 second moment and inverse difference moment, indicating a substantial rise in angiogram textural  
344 heterogeneity in pathological conditions. Our findings suggest that the GLCM method may be used as  
345 an addition to the conventional fluoroscopic angiography analysis of micro-/macrovascular integrity  
346 for a more accurate diagnosis. To the best of our knowledge, this is the first study to use GLCM and  
347 DWT based approach in decellularized kidney experimental model, augmenting appropriate evaluation  
348 of the decellularized kidneys vasculature, to accomplish lasting vascular patency post-transplantation,  
349 thereby giving hope to impede a looming epidemic of morbidity or mortality due to kidney diseases.  
350 This approach is the first step toward developing an automated network that can detect debilitating  
351 changes in the decellularized vasculature and supporting tissue network.

## 352 **6 Conflict of Interest**

353 The authors declare that the research was conducted in the absence of any commercial or financial  
354 relationships that could be construed as a potential conflict of interest.

## 355 **7 Author Contributions**

356 P.R.C. and I.V.P, conceived and designed project. P.R.C. performed all experiments, analyzed the  
357 associated data, interpreted results of experiments. I.V.P. performed all computation analyses. I.V.P.,  
358 A.S., G.P., and P.R.C drafted, edited, and approved final version of manuscript.

## 359 **8 Funding**

360 This study was supported in part by an Institutional Research and Academic Career Development  
361 Award (IRACDA), Grant No. NIH/NIGMS K12-GM102773, and funds from Khalifa University of  
362 Science and Technology, Grant Nos. FSU-2020-25 and RC2-2018-022 (HEIC).

## 363 **9 Acknowledgments**

364 The author would like to acknowledge Dr. Zambon for help with decellularization. The authors  
365 would also like to thank Ms. Anousha Khan, Ms. Xinyu Wang, and Nnamdi Ugwuoke for reviewing  
366 the manuscript.

## 367 **10 Data Availability Statement**

368 The datasets generated for this study are available on request to the corresponding author.

## 369 **11 References**

- 370 Arikan, H., Ozturk, S., Tokgoz, B., Dursun, B., Seyahi, N., Trabulus, S., et al. (2021). Characteristics  
371 and outcomes of acute kidney injury in hospitalized COVID-19 patients: A multicenter study  
372 by the Turkish society of nephrology. *PLoS One* 16(8), e0256023. doi:  
373 10.1371/journal.pone.0256023.
- 374 Cao, W., Pomeroy, M.J., Gao, Y., Barish, M.A., Abbasi, A.F., Pickhardt, P.J., et al. (2019). Multi-scale  
375 characterizations of colon polyps via computed tomographic colonography. *Vis Comput Ind*  
376 *Biomed Art* 2(1), 25. doi: 10.1186/s42492-019-0032-7.
- 377 Chen, H., Li, W., and Zhu, Y. (2021). Improved window adaptive gray level co-occurrence matrix for  
378 extraction and analysis of texture characteristics of pulmonary nodules. *Comput Methods*  
379 *Programs Biomed* 208, 106263. doi: 10.1016/j.cmpb.2021.106263.
- 380 Corridon, P.R. (2021). In vitro investigation of the impact of pulsatile blood flow on the vascular  
381 architecture of decellularized porcine kidneys. *Sci Rep* 11(1), 16965. doi: 10.1038/s41598-021-  
382 95924-5.
- 383 Corridon, P.R., Karam, S.H., Khraibi, A.A., Khan, A.A., and Alhashmi, M.A. (2021). Intravital  
384 imaging of real-time endogenous actin dysregulation in proximal and distal tubules at the onset  
385 of severe ischemia-reperfusion injury. *Sci Rep* 11(1), 8280. doi: 10.1038/s41598-021-87807-6.
- 386 Davidovic LM, Laketic D, Cumic J, Jordanova E, Pantic I. Application of artificial intelligence for  
387 detection of chemico-biological interactions associated with oxidative stress and DNA damage.  
388 *Chem Biol Interact.* 2021 Aug 25;345:109533. doi: 10.1016/j.cbi.2021.109533.
- 389 Feng, H., Xu, Y., Luo, S., Dang, H., Liu, K., and Sun, W.Q. (2020). Evaluation and preservation of  
390 vascular architectures in decellularized whole rat kidneys. *Cryobiology* 95, 72-79. doi:  
391 10.1016/j.cryobiol.2020.06.003.
- 392 Garcia, G., Maiora, J., Tapia, A., and De Blas, M. (2012). Evaluation of texture for classification of  
393 abdominal aortic aneurysm after endovascular repair. *J Digit Imaging* 25(3), 369-376. doi:  
394 10.1007/s10278-011-9417-7.
- 395 Garcia, G., Tapia, A., and De Blas, M. (2014). Computer-supported diagnosis for endotension cases in  
396 endovascular aortic aneurysm repair evolution. *Comput Methods Programs Biomed* 115(1), 11-  
397 19. doi: 10.1016/j.cmpb.2014.03.004.
- 398 Haralick, R.M., Shanmugam, K., and Dinstein, I. (1973). Textural Features for Image Classification.  
399 *IEEE Transactions on Systems, Man, and Cybernetics* SMC-3(6), 610-621. doi:  
400 10.1109/TSMC.1973.4309314.
- 401 Hsu, R.K., and Hsu, C.Y. (2016). The Role of Acute Kidney Injury in Chronic Kidney Disease. *Semin*  
402 *Nephrol* 36(4), 283-292. doi: 10.1016/j.semnephrol.2016.05.005.
- 403 Huang, L., Feng, B., Li, Y., Liu, Y., Chen, Y., Chen, Q., et al. (2021). Computed Tomography-Based  
404 Radiomics Nomogram: Potential to Predict Local Recurrence of Gastric Cancer After Radical  
405 Resection. *Front Oncol* 11, 638362. doi: 10.3389/fonc.2021.638362.

- 406 Huling, J.C., Atala, A., and Yoo, J.J. (2016). "Chapter 42 - Decellularized Whole Organ Scaffolds for  
407 the Regeneration of Kidneys," in *Kidney Development, Disease, Repair and Regeneration*, ed.  
408 M.H. Little. (San Diego: Academic Press), 569-578.
- 409 Job, K., and Antony, A. (2018). "Organ Donation and Transplantation: "Life after Death".")
- 410 Kari, J.A., Shalaby, M.A., Albanna, A.S., Alahmadi, T.S., Alherbish, A., and Alhasan, K.A. (2021).  
411 Acute kidney injury in children with COVID-19: a retrospective study. *BMC Nephrol* 22(1),  
412 202. doi: 10.1186/s12882-021-02389-9.
- 413 Khan, H.A., Shahzad, M.A., Iqbal, F., Awan, M.A., Sharjeel, M., Khan, Q.A., et al. (2020). A Novel  
414 Method of Quantifying the Choriocapillaris in Normal and Post-inflammatory Eyes. *Ocul  
415 Immunol Inflamm*, 1-7. doi: 10.1080/09273948.2020.1800047.
- 416 Kociolek, M., Materka, A., Strzelecki, M., and Szczypiński, P. (2001). *Discrete wavelet transform-  
417 derived features for digital image texture analysis*.
- 418 Kolb, A.L., Corridon, P.R., Zhang, S., Xu, W., Witzmann, F.A., Collett, J.A., et al. (2018). Exogenous  
419 Gene Transmission of Isocitrate Dehydrogenase 2 Mimics Ischemic Preconditioning  
420 Protection. *J Am Soc Nephrol* 29(4), 1154-1164. doi: 10.1681/ASN.2017060675.
- 421 Kolossvary, M., Javorszky, N., Karady, J., Vecsey-Nagy, M., David, T.Z., Simon, J., et al. (2021).  
422 Effect of vessel wall segmentation on volumetric and radiomic parameters of coronary plaques  
423 with adverse characteristics. *J Cardiovasc Comput Tomogr* 15(2), 137-145. doi:  
424 10.1016/j.jcct.2020.08.001.
- 425 Kolossvary, M., Szilveszter, B., Karady, J., Drobni, Z.D., Merkely, B., and Maurovich-Horvat, P.  
426 (2019). Effect of image reconstruction algorithms on volumetric and radiomic parameters of  
427 coronary plaques. *J Cardiovasc Comput Tomogr* 13(6), 325-330. doi:  
428 10.1016/j.jcct.2018.11.004.
- 429 Maidman, S.D., Eberly, L.M., Greenbaum, A.B., Guyton, R.A., and Wells, B.J. (2021). Postinfarction  
430 Ventricular Septal Rupture and Hemopericardium with Tamponade Physiology. *CASE (Phila)*  
431 5(1), 48-50. doi: 10.1016/j.case.2020.10.010.
- 432 Marschner, C.B., Kokla, M., Amigo, J.M., Rozanski, E.A., Wiinberg, B., and McEvoy, F.J. (2017).  
433 Texture analysis of pulmonary parenchymateous changes related to pulmonary  
434 thromboembolism in dogs - a novel approach using quantitative methods. *BMC Vet Res* 13(1),  
435 219. doi: 10.1186/s12917-017-1117-1.
- 436 Mostaco-Guidolin, L.B., Ko, A.C., Wang, F., Xiang, B., Hewko, M., Tian, G., et al. (2013). Collagen  
437 morphology and texture analysis: from statistics to classification. *Sci Rep* 3, 2190. doi:  
438 10.1038/srep02190.
- 439 Neri, E., de Souza, N., Brady, A., Bayarri, A.A., Becker, C.D., Coppola, F., et al. (2019). What the  
440 radiologist should know about artificial intelligence – an ESR white paper. *Insights into  
441 Imaging* 10(1), 44. doi: 10.1186/s13244-019-0738-2.
- 442 Paunovic, J., Vučević, D., Radosavljević, T., Vukomanović Djurdjević, B., Stanković, S., and Pantić,  
443 I. (2021a). Effects of Iron Oxide Nanoparticles on Structural Organization of Hepatocyte  
444 Chromatin: Gray Level Co-occurrence Matrix Analysis. *Microsc Microanal* 27(4), 889-896.  
445 doi: 10.1017/S1431927621000532.
- 446 Paunovic, J., Vučević, D., Radosavljević, T., Vukomanović Djurdjević, B., Stanković, S., and Pantić,  
447 I. (2021b). Effects of Iron Oxide Nanoparticles on Structural Organization of Hepatocyte



- 448 Chromatin: Gray Level Co-occurrence Matrix Analysis. *Microscopy and Microanalysis* 27(4),  
449 889-896. doi: 10.1017/S1431927621000532.
- 450 Saidi, R.F., and Hejazii Kenari, S.K. (2014). Challenges of organ shortage for transplantation: solutions  
451 and opportunities. *Int J Organ Transplant Med* 5(3), 87-96.
- 452 Santos, T.A., Maistro, C.E., Silva, C.B., Oliveira, M.S., Franca, M.C., Jr., and Castellano, G. (2015).  
453 MRI Texture Analysis Reveals Bulbar Abnormalities in Friedreich Ataxia. *AJNR Am J*  
454 *Neuroradiol* 36(12), 2214-2218. doi: 10.3174/ajnr.A4455.
- 455 Shankar, K., Perumal, E., Tiwari, P., Shorfuzzaman, M., and Gupta, D. (2021). Deep learning and  
456 evolutionary intelligence with fusion-based feature extraction for detection of COVID-19 from  
457 chest X-ray images. *Multimed Syst*, 1-13. doi: 10.1007/s00530-021-00800-x.
- 458 Sohn, S., Buskirk, M., Buckenmeyer, M., Londono, R., and Faulk, D. (2020). Whole Organ  
459 Engineering: Approaches, Challenges, and Future Directions. *Applied Sciences* 10, 4277. doi:  
460 10.3390/app10124277.
- 461 Strzelecki, M., Szczypinski, P., Materka, A., and Klepaczko, A. (2013). A software tool for automatic  
462 classification and segmentation of 2D/3D medical images. *Nuclear Instruments and Methods*  
463 *in Physics Research Section A: Accelerators, Spectrometers, Detectors and Associated*  
464 *Equipment* 702, 137-140. doi: <https://doi.org/10.1016/j.nima.2012.09.006>.
- 465 Sullivan, D.C., Mirmalek-Sani, S.H., Deegan, D.B., Baptista, P.M., Aboushwareb, T., Atala, A., et al.  
466 (2012). Decellularization methods of porcine kidneys for whole organ engineering using a high-  
467 throughput system. *Biomaterials* 33(31), 7756-7764. doi: 10.1016/j.biomaterials.2012.07.023.
- 468 Szczypinski, P.M., Strzelecki, M., and Materka, A. (Year). "Mazda - a software for texture analysis",  
469 in: *2007 International Symposium on Information Technology Convergence (ISITC 2007)*,  
470 245-249.
- 471 Szczypinski, P.M., Strzelecki, M., Materka, A., and Klepaczko, A. (2009). MaZda--a software package  
472 for image texture analysis. *Comput Methods Programs Biomed* 94(1), 66-76. doi:  
473 10.1016/j.cmpb.2008.08.005.
- 474 Thuillier, P., Bourhis, D., Schick, U., Alavi, Z., Guezennec, C., Robin, P., et al. (2021). Diagnostic  
475 value of positron-emission tomography textural indices for malignancy of 18F-  
476 fluorodeoxyglucose-avid adrenal lesions. *Q J Nucl Med Mol Imaging* 65(1), 79-87. doi:  
477 10.23736/S1824-4785.19.03138-8.
- 478 Topalovic, N., Mazic, S., Nestic, D., Vukovic, O., Cumic, J., Laketic, D., et al. (2021). Association  
479 between Chromatin Structural Organization of Peripheral Blood Neutrophils and Self-  
480 Perceived Mental Stress: Gray-Level Co-occurrence Matrix Analysis. *Microsc Microanal*, 1-  
481 7. doi: 10.1017/S143192762101240X.
- 482 V, V., Gudigar, A., Raghavendra, U., Hegde, A., Menon, G.R., Molinari, F., et al. (2021). Automated  
483 Detection and Screening of Traumatic Brain Injury (TBI) Using Computed Tomography  
484 Images: A Comprehensive Review and Future Perspectives. *Int J Environ Res Public Health*  
485 18(12). doi: 10.3390/ijerph18126499.
- 486 Wu, H., Lau, E.S.H., Yang, A., Szeto, C.C., Ma, R.C.W., Kong, A.P.S., et al. (2021). Trends in kidney  
487 failure and kidney replacement therapy in people with diabetes in Hong Kong, 2002-2015: A  
488 retrospective cohort study. *Lancet Reg Health West Pac* 11, 100165. doi:  
489 10.1016/j.lanwpc.2021.100165.

490 Zambon, J.P., Ko, I.K., Abolbashari, M., Huling, J., Clouse, C., Kim, T.H., et al. (2018). Comparative  
491 analysis of two porcine kidney decellularization methods for maintenance of functional  
492 vascular architectures. *Acta Biomater* 75, 226-234. doi: 10.1016/j.actbio.2018.06.004.

493

494
